# Supplementary material for: BCL7A is silenced by hypermethylation to promote acute myeloid leukemia
Source: Biomark Res. 2023 Mar 20;11:32. doi: 10.1186/s40364-023-00472-x (PMC10026484; doi:10.1186/s40364-023-00472-x)
Supplement: Supplementary file 1 — Additional file 1: Supplementary Figure 1. Diagram displaying CpG-methylation status around the BCL7A TSS. Genomic DNA from the NB4 cell line was subjected to bisulfite conversion and used for subsequent TA-cloning. Supplementary Figure 2. Schematic representation of the different lentiviral plasmids used in the experimental procedures. The specific region of the long isoform of BCL7A is colored in blue. Supplementary Figure 3. Western blot including the Decitabine (DAC) treatment over the NB4 cell line shown in Fig. 2c. Supplementary Figure 4. Protein-protein interactions between BCL7A and SMARCA4 as determined by Mashtalir et al (2020). Supplementary Figure 5. DepMap AML cell lines collection data showing BCL7A Methylation Fraction (1kb upstream TSS) vs BCL7Aexpression level. NB4 and M07e are marked. Supplementary Figure 6. Competition cell growth effect of BCL7A expression restoration on in vitro proliferation. Supplementary Table 1. [file 40364_2023_472_MOESM1_ESM.pdf]

Supplementary Figure 1

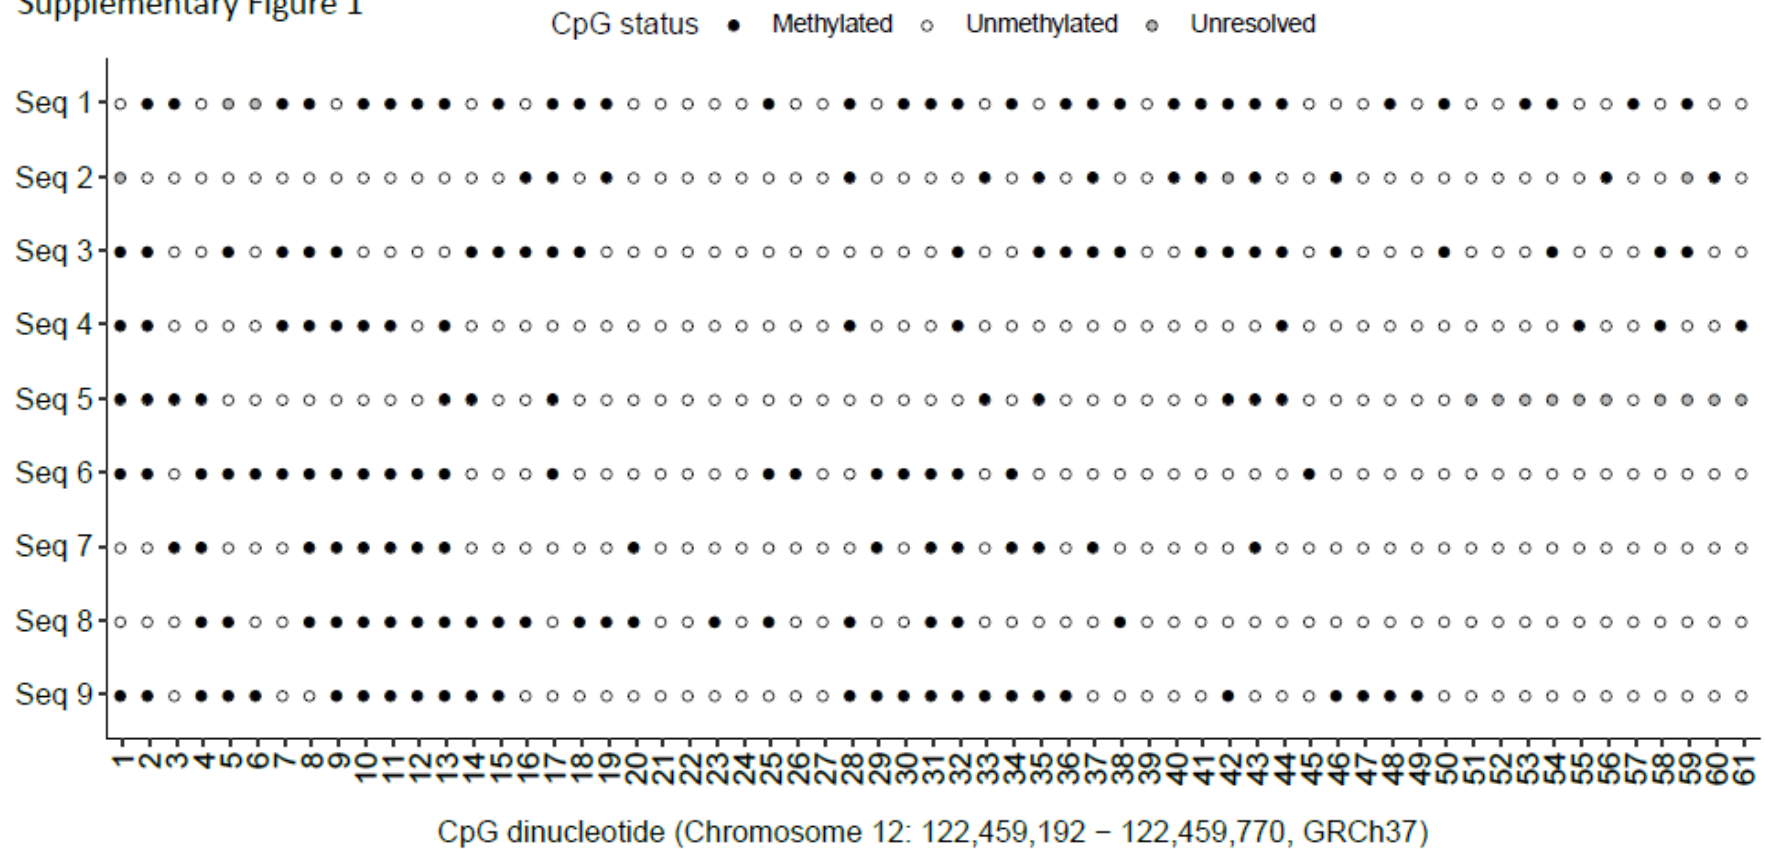

1

2 **Supplementary Figure 1.** Diagram displaying CpG-methylation status around the *BCL7A* TSS. Genomic DNA from the NB4 cell line was subjected to bisulfite  
3 conversion and used for subsequent TA-cloning. Then, nine independent amplicons were analysed by Sanger sequencing. 61 CpG sites included in the 579 bp  
4 amplicon (chr12:122,459,192 - 122,459,770 GRCh37; hg19 genome assembly) were assessed.

## Supplementary Figure 2

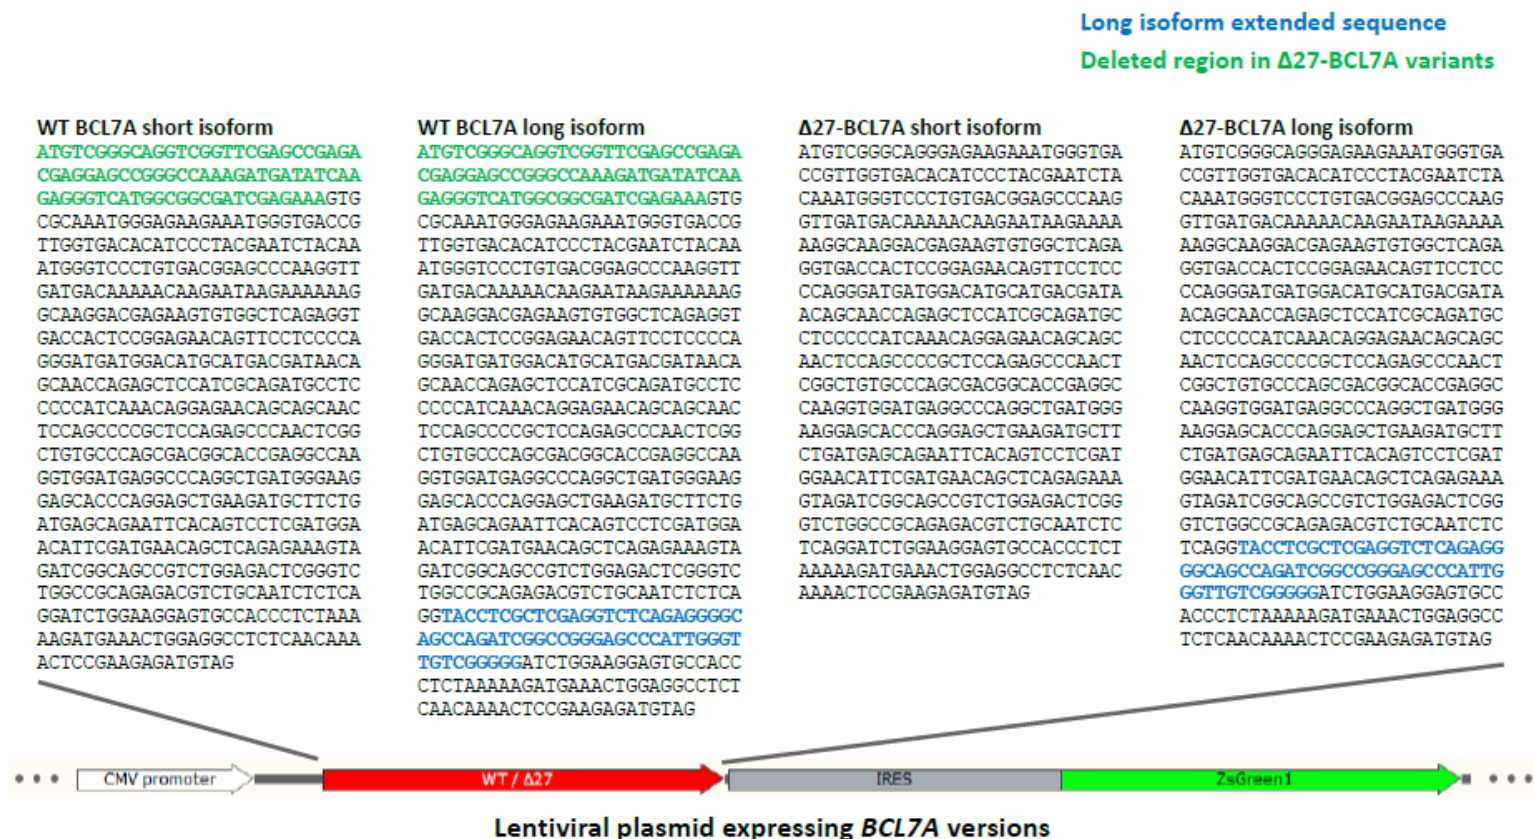

5

6 **Supplementary Figure 2.** Schematic representation of the different lentiviral plasmids used in the experimental procedures. The specific region of the long  
7 isoform of BCL7A is colored in blue. The specific region that is deleted in the BCL7A mutant ( $\Delta 27$ -BCL7A) is colored in green. The Empty Vector (EV) has the  
8 pLVX-IRES-ZsGreen1 structure without any insert.

9     **Supplementary Figure 3**

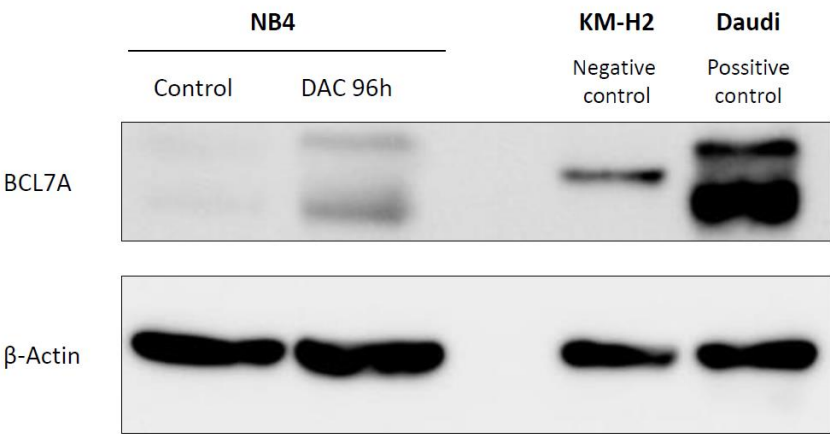

11     **Supplementary Figure 3.** Western blot including the Decitabine (DAC) treatment over the NB4  
12     cell line shown in Fig. 2c. Here we also show the rest of the lanes including a negative control of  
13     BCL7A expression (KM-H2 cell line, which has no BCL7A expression), and a positive control  
14     (Daudi cell line) which expresses average BCL7A levels. The band which appears in KM-H2  
15     sample is an inespecific band due to an inespecific binding of the anti-BCL7A (Cat#HPA019762)  
16     that we used.

**Supplementary Figure 4**

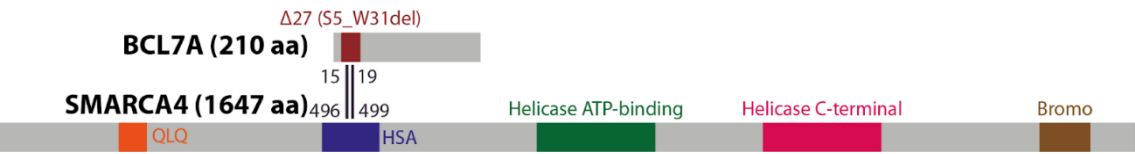

**Supplementary Figure 4.** Protein-protein interactions between BCL7A and SMARCA4 as determined by Mashtalir et al (2020). The numbers indicate the amino acid positions that interact with each other (solid lines). The region from exon 1 that is deleted in splice site mutant BCL7A (Δ27) is marked in red. Known domains of SMARCA4 as described in UniProt are also marked. HSA: helicase/SANT-associated.

27    **Supplementary Figure 5**

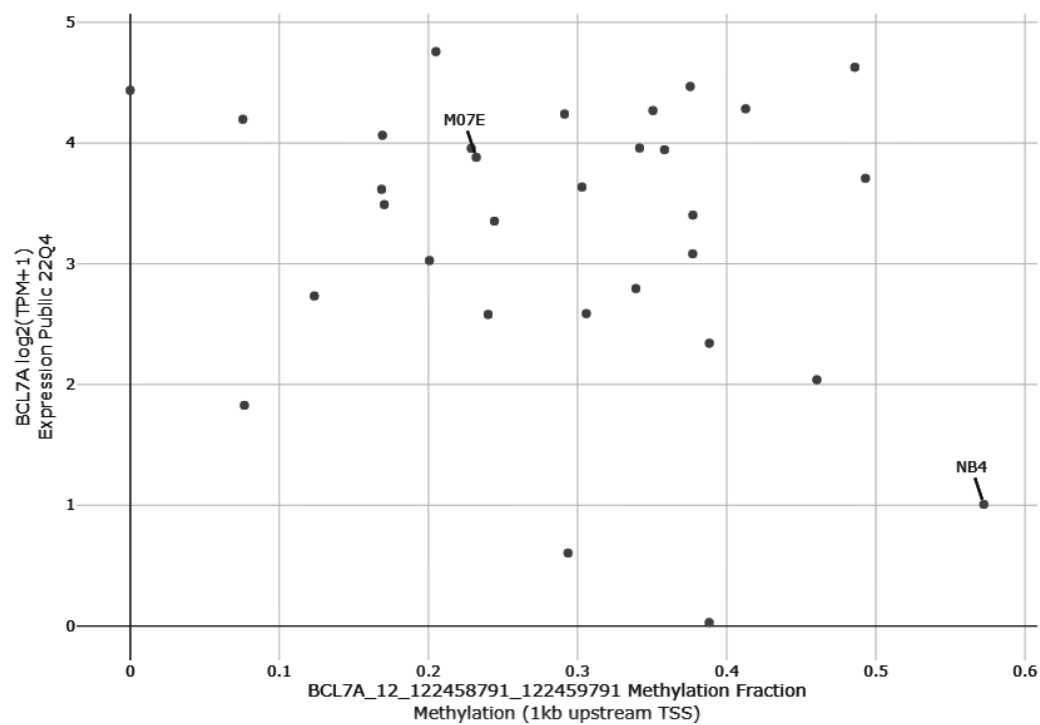

28

29    **Supplementary Figure 5.** DepMap AML cell lines collection data showing BCL7A Methylation  
30    Fraction (1kb upstream TSS) vs BCL7A expression level. NB4 and M07e are marked.

31 **Supplementary Figure 6**

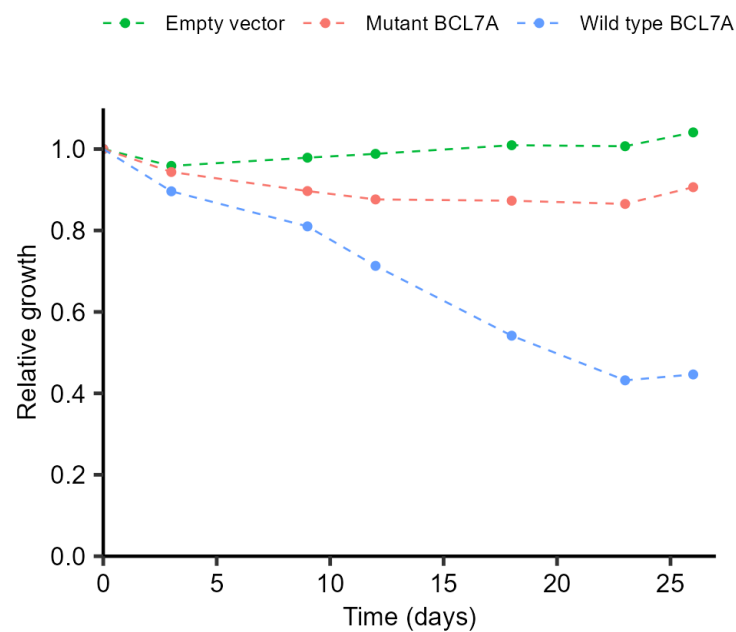

32

33 **Supplementary Figure 6.** Competition cell growth effect of BCL7A expression restoration *on in*  
34 *vitro* proliferation. Competition cell growth assay of non-transduced M-07e cells vs M-07e cells  
35 transduced with either pLVX-IRES-ZsGreen1 plasmid expressing wild-type BCL7A, mutant BCL7A  
36 ( $\Delta 27$ -BCL7A), or empty vector. All constructs were evaluated in a time course of ZsGreen1+ %  
37 measurements on days 0, 3, 9, 12, 18, 23 and 26. This assay involves the co-culture of an M-07e  
38 model transduced with one of the plasmids together with non-transduced M-07e cells.

39 **Supplementary Table 1**

| Cell line  | Subtype | BCL7A mRNA,<br>log <sub>2</sub> (TPM+1) |
|------------|---------|-----------------------------------------|
| OCI-AML3   | AML     | 0,028569152                             |
| AML-193    | AML     | 0,604071324                             |
| NB4        | AML     | 1,007195501                             |
| BDCM       | AML     | 1,827819025                             |
| HEL        | AML     | 2,039138394                             |
| OCI-M2     | AML     | 2,056583528                             |
| HEL 92.1.7 | AML     | 2,341985747                             |
| NA         | AML     | 2,40053793                              |
| HL-60      | AML     | 2,580145484                             |
| MUTZ-8     | AML     | 2,587364991                             |
| NOMO-1     | AML     | 2,587364991                             |
| TF-1       | AML     | 2,733354341                             |
| F-36P      | AML     | 2,752748591                             |
| OCI-M1     | AML     | 2,794935663                             |
| MOLM-14    | AML     | 2,944858446                             |
| SHI-1      | AML     | 3,016139703                             |
| OCI-AML4   | AML     | 3,025028794                             |
| SKM-1      | AML     | 3,026800059                             |
| CMK        | AML     | 3,08236197                              |
| NA         | AML     | 3,116031993                             |
| CMK-11-5   | AML     | 3,122672719                             |
| SKNO-1     | AML     | 3,148934105                             |
| MV4;11     | AML     | 3,277984747                             |
| U-937      | AML     | 3,353323291                             |
| PL-21      | AML     | 3,49057013                              |
| KO52       | AML     | 3,614709844                             |
| KASUMI-1   | AML     | 3,626439137                             |
| ME-1       | AML     | 3,635754391                             |
| SIG-M5     | AML     | 3,708187236                             |
| EOL-1      | AML     | 3,786596362                             |
| M-07e      | AML     | 3,881664619                             |
| OCI-AML5   | AML     | 3,944858446                             |
| MONO-MAC-1 | AML     | 3,956056652                             |
| P31/FUJ    | AML     | 3,957914599                             |
| NA         | AML     | 3,9800253                               |
| Set-2      | AML     | 4,06436554                              |
| KG-1       | AML     | 4,196134881                             |
| Kasumi-6   | AML     | 4,239550797                             |
| MOLM-16    | AML     | 4,268284667                             |
| THP-1      | AML     | 4,283180979                             |
| MONO-MAC-6 | AML     | 4,436961338                             |
| GDM-1      | AML     | 4,467931546                             |
| MOLM-13    | AML     | 4,627023106                             |
| OCI-AML2   | AML     | 4,757023247                             |

| Cell line  | Subtype | BCL7A mRNA,<br>log <sub>2</sub> (TPM+1) |
|------------|---------|-----------------------------------------|
| A4/Fuk     | DLBCL   | 1,250961574                             |
| A3/KAW     | DLBCL   | 2,386810946                             |
| OCILY-13   | DLBCL   | 3,399171094                             |
| KML-1      | DLBCL   | 3,777156666                             |
| SU-DHL-8   | DLBCL   | 4,341274184                             |
| RC-K8      | DLBCL   | 4,622930351                             |
| HT         | DLBCL   | 4,657068301                             |
| NU-DHL-1   | DLBCL   | 4,894817763                             |
| OCI-LY3    | DLBCL   | 4,905447179                             |
| WSU-NHL    | DLBCL   | 5,058316496                             |
| RL         | DLBCL   | 5,086189313                             |
| SU-DHL-5   | DLBCL   | 5,298291731                             |
| OCI-LY-19  | DLBCL   | 5,362469889                             |
| OCI-LY7    | DLBCL   | 5,479618608                             |
| Farage     | DLBCL   | 5,482202926                             |
| OCI-LY18   | DLBCL   | 5,560714954                             |
| NU-DUL-1   | DLBCL   | 5,646738698                             |
| SU-DHL-4   | DLBCL   | 5,935223994                             |
| Pfeiffer   | DLBCL   | 6,013238915                             |
| SU-DHL-10  | DLBCL   | 6,31596467                              |
| DB         | DLBCL   | 6,464831606                             |
| WSU-DLCL2  | DLBCL   | 6,594399256                             |
| Toledo     | DLBCL   | 6,599020177                             |
| VAL        | DLBCL   | 6,627606838                             |
| SU-DHL-6   | DLBCL   | 6,657354182                             |
| DOHH-2     | DLBCL   | 6,827692021                             |
| U-2904     | DLBCL   | 6,874059203                             |
| KARPAS-422 | DLBCL   | 6,912649865                             |
| RI-1       | DLBCL   | 7,126601235                             |

40

41 **Supplementary Table 1.** *BCL7A* mRNA expression level in log<sub>2</sub>(TPM+1) and subtype of the cell

42 lines included in Fig. 2a. Data from DepMap Portal database (22Q2).
